# Supplementary material
Source: PubMed Central journal article supplement (PMC3162472)
Supplement: NIHMS63183-supplement-1si20051218_10.pdf [file NIHMS63183-supplement-1si20051218_10.pdf]

**Thionitroxides, RSNHO·: The Structure of the SNO Moiety in “S-Nitrosohemoglobin”, a possible NO Reservoir and Transporter.**

Yi-Lei Zhao and K. N. Houk\*

**Supporting Information**

Full citation for Gaussian software (ref. 9): Frisch, M. J., Trucks, G. W., Schlegel, H. B., Scuseria, G. E., Robb, M. A., Cheeseman, J. R., Montgomery, J. A., Vreven, T. J., Kudin, K. N., Burant, J. C., Millam, J. M., Iyengar, S. S., Tomasi, J., V. Barone, B. M., M. Cossi, G. Scalmani, N. Rega,, G. A. Petersson, H. N., M. Hada, M. Ehara, K. Toyota,, R. Fukuda, J. H., M. Ishida, T. Nakajima, Y. Honda, O. Kitao,, H. Nakai, M. K., X. Li, J. E. Knox, H. P. Hratchian, J. B. Cross,, C. Adamo, J. J., R. Gomperts, R. E. Stratmann, O. Yazyev,, A. J. Austin, R. C., C. Pomelli, J. W. Ochterski, P. Y. Ayala,, K. Morokuma, G. A. V., P. Salvador, J. J. Dannenberg,, V. G. Zakrzewski, S. D., A. D. Daniels, M. C. Strain,, O. Farkas, D. K. M., A. D. Rabuck, K. Raghavachari,, J. B. Foresman, J. V. O., Q. Cui, A. G. Baboul, S. Clifford,, J. Cioslowski, B. B. S., G. Liu, A. Liashenko, P. Piskorz,, I. Komaromi, R. L. M., D. J. Fox, T. Keith, M. A. Al-Laham,, C. Y. Peng, A. N., M. Challacombe, P. M. W. Gill,, and B. Johnson, W. C., M. W. Wong, C. Gonzalez, and J. A. Pople., (2003), Gaussian, Inc., Pittsburgh PA.

Fig. S1. The NO-modified protein, “S-nitroso-nitrosylhemoglobin” (PDB code: 1BUW from RCSB Protein Data Bank):

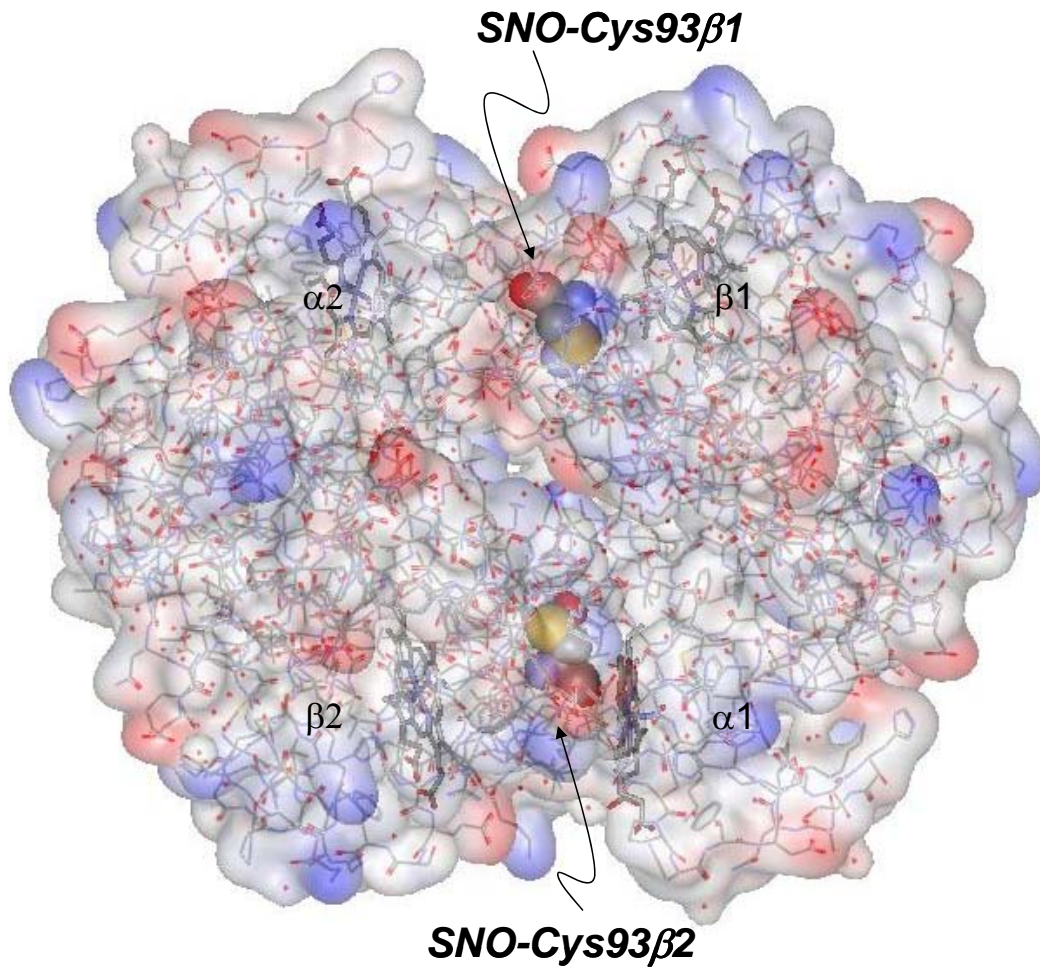

Fig. S2. The environments of SNO-Cys  $\beta$ 1 (top) and SNO-Cys  $\beta$ 2 (bottom) from 1BUW.

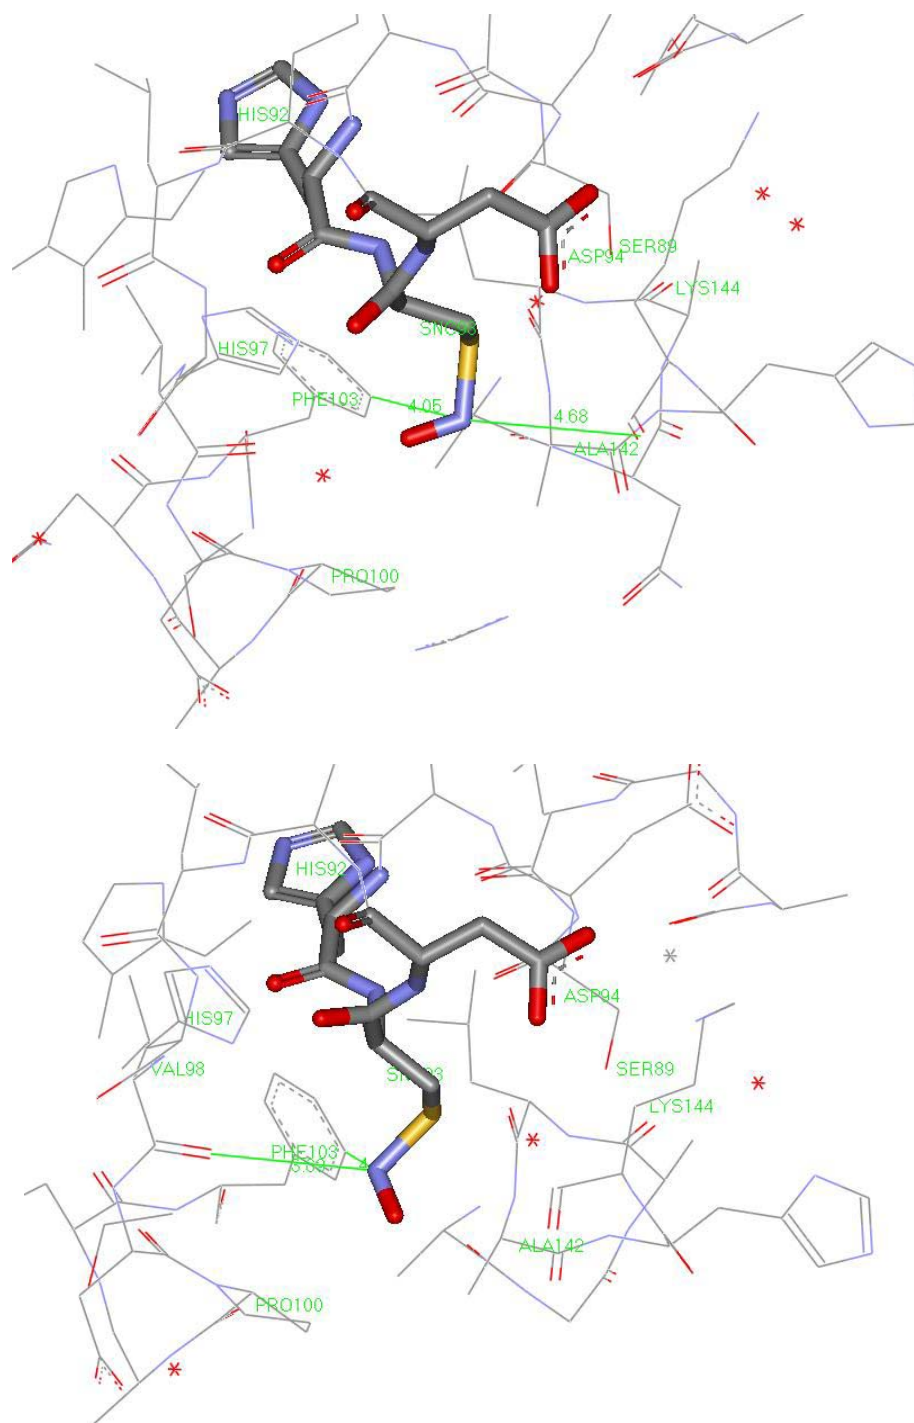

Fig. S3. Other calculated stationary points (8-20).

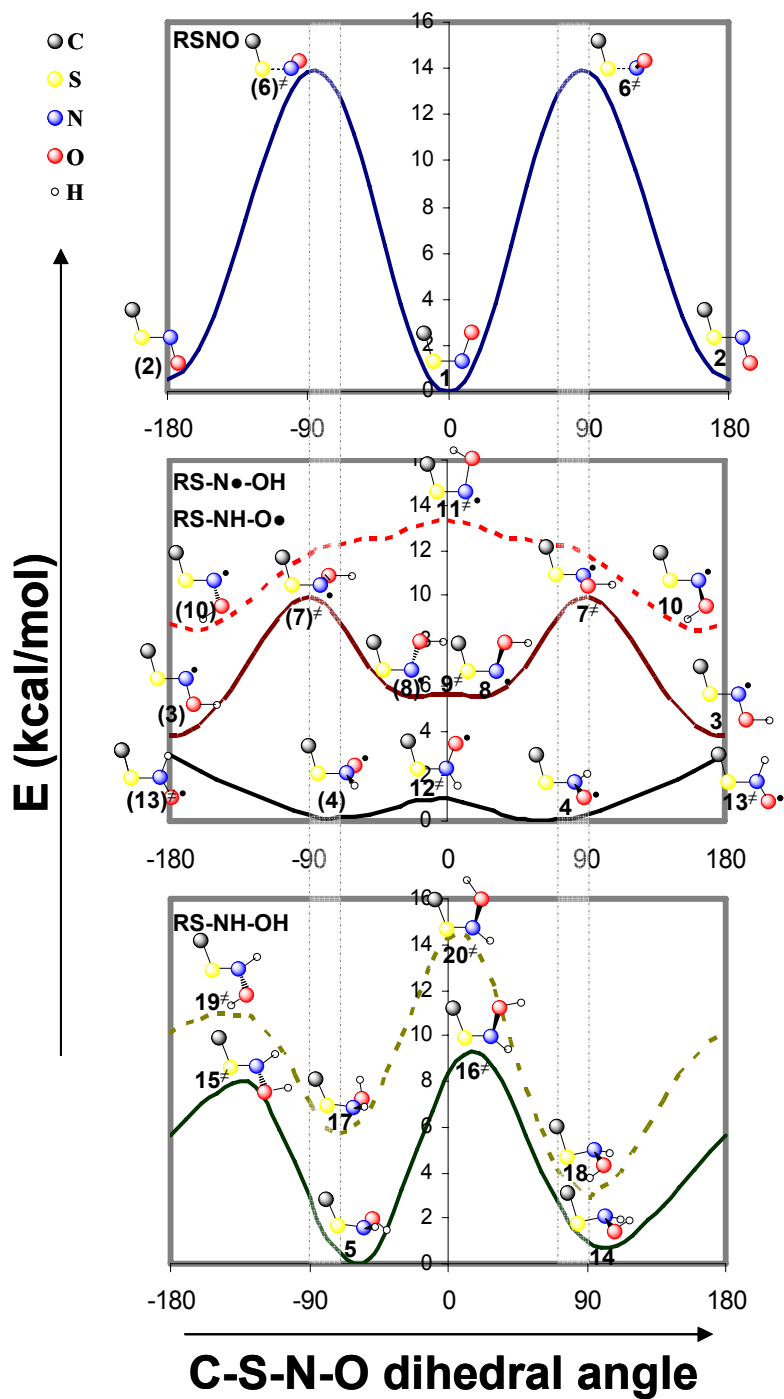

Fig. S4. The calculated structures of other stationary points not available in Fig. 3.

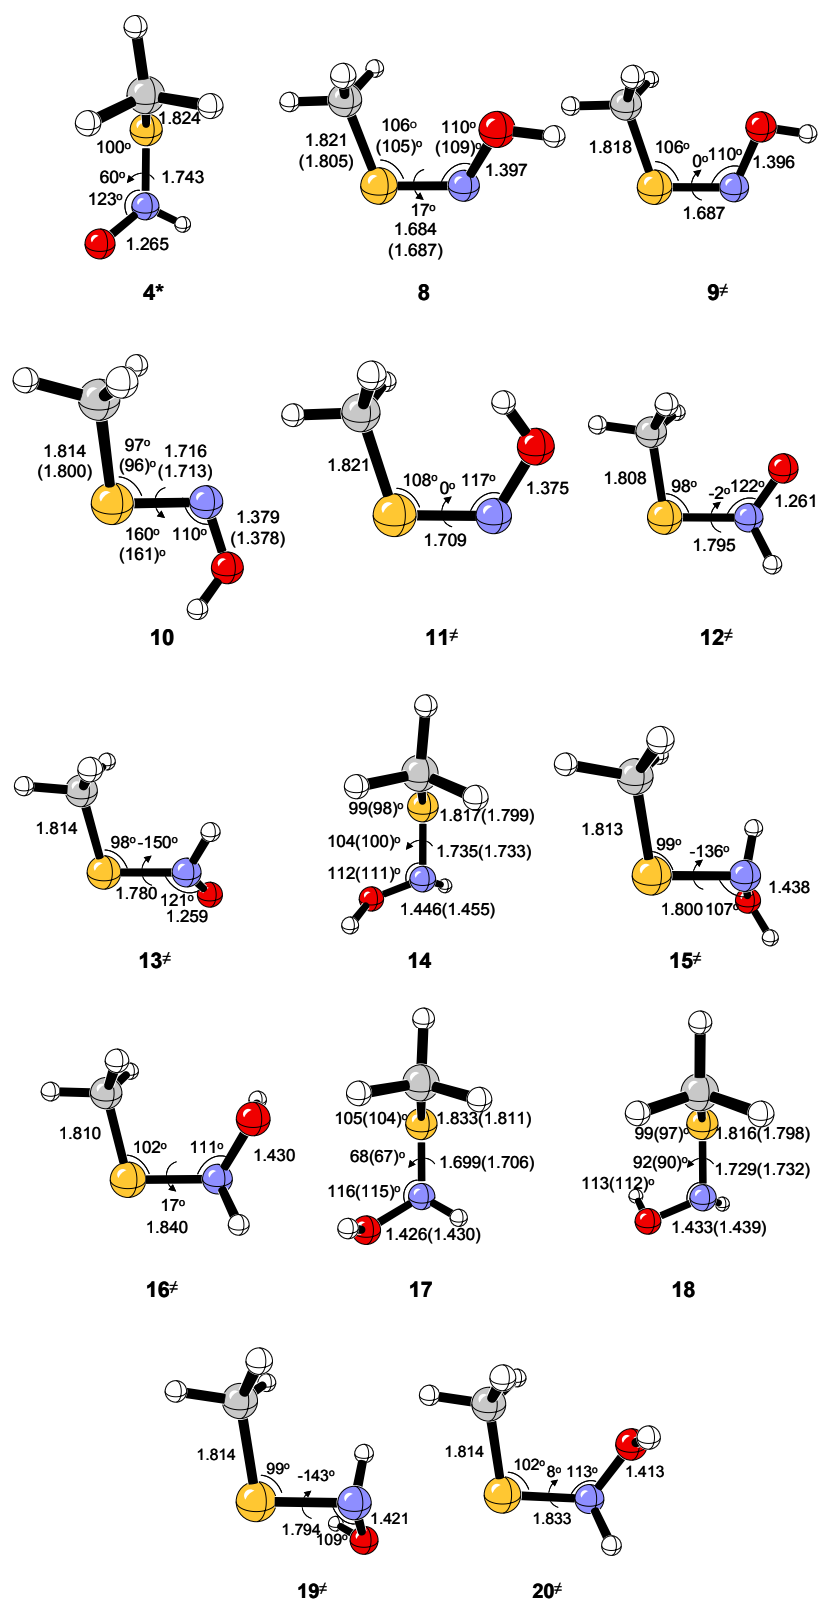

Table S1. All stationary points (appended to Table 1): Calculated geometrical parameters (in the gas phase), relative Energies, and solvation energies in aqueous solutions [B3LYP(CPCM)/6-31+G\*//CBS-QB3,  $\epsilon = 78.39$ ] for the four SNO species (RSNO, RS-N<sup>•</sup>-OH, RS-NH-O<sup>•</sup>, and RS-NH-OH; R = Me) with DFT (B3LYP/CBSQB7), CBS-QB3, and G3 methods.

|                       | Dihedral angle  |         | Bond lengths |         | Relative Energies |         |      | Solvation                      |
|-----------------------|-----------------|---------|--------------|---------|-------------------|---------|------|--------------------------------|
|                       | C-S-N-O         | N-O     | N-O          | S-N     | DFT               | CBS-QB3 | G3   | $\epsilon=78.39$<br>(kcal/mol) |
| RSNO                  | 1               | 0°      | 1.18         | 1.87    | 0.0               | 0.0     | 0.0  | -1.2                           |
|                       | 2               | 180°    | 1.19(2)      | 1.84(5) | 1.2               | 1.1     | -0.1 | -0.9                           |
|                       | 6 <sup>‡</sup>  | 85°     | 1.15         | 2.04    | 13.2              | 11.6    | —    | -1.4                           |
| RS-N <sup>•</sup> -OH | 3               | 180°    | 1.40         | 1.70    | 3.1               | 0.1     | -0.5 | -6.2                           |
|                       | 8               | 17°     | 1.40         | 1.69    | 4.2               | 1.6     | 0.7  | -5.9                           |
|                       | 9 <sup>‡</sup>  | 0°      | 1.40         | 1.69    | 4.8               | 2.2     | —    | -6.0                           |
|                       | 7 <sup>‡</sup>  | 91°     | 1.38         | 1.74    | 9.9               | 7.7     | —    | -6.4                           |
|                       | 10              | 161(1)° | 1.38         | 1.71(1) | 6.7               | 3.9     | 2.8  | -7.1                           |
|                       | 11 <sup>‡</sup> | 0       | 1.38         | 1.71    | 9.2               | 6.7     | —    | -8.9                           |
| RS-NH-O <sup>•</sup>  | 4               | 63(1)°  | 1.26         | 1.74(1) | 0.0               | 0.0     | 0.0  | -6.6                           |
|                       | 12 <sup>‡</sup> | 2°      | 1.26         | 1.80    | 2.1               | 2.5     | —    | -6.5                           |
|                       | 13 <sup>‡</sup> | 150     | 1.26         | 1.78    | 4.8               | 5.1     | —    | -8.7                           |
| RS-NH-OH              | 5               | 56°     | 1.45(1)      | 1.72    | 0.0               | 0.0     | 0.0  | -6.6                           |

|                 |                     |         |         |      |      |     |       |
|-----------------|---------------------|---------|---------|------|------|-----|-------|
| 14              | 102(2) <sup>o</sup> | 1.45(1) | 1.73(1) | 1.1  | 0.6  | 0.5 | -7.2  |
| 15 <sup>‡</sup> | -136 <sup>o</sup>   | 1.44    | 1.80    | 8.9  | 8.5  | —   | -8.3  |
| 16 <sup>‡</sup> | 17 <sup>o</sup>     | 1.43    | 1.84    | 10.1 | 10.5 | —   | -7.0  |
| 17              | 67(1) <sup>o</sup>  | 1.43    | 1.70    | 4.7  | 4.2  | 4.2 | -9.9  |
| 18              | 91(1) <sup>o</sup>  | 1.43(1) | 1.73    | 2.7  | 2.0  | 1.9 | -8.1  |
| 19 <sup>‡</sup> | -143 <sup>o</sup>   | 1.42    | 1.79    | 11.3 | 10.4 | —   | -10.0 |
| 20 <sup>‡</sup> | 8 <sup>o</sup>      | 1.41    | 1.83    | 14.4 | 14.4 | —   | -10.1 |

---

|       |                                  |         |         |
|-------|----------------------------------|---------|---------|
| expl. | 76 <sup>o</sup> ,88 <sup>o</sup> | 1.21(1) | 1.76(1) |
|-------|----------------------------------|---------|---------|

---

\*note: There are some other stationary points near these structures; they have very similar structure and energy as their neighbors have, like structures **8** and **9**, due to the easy flip of nitrogen lone-pair (or unpaired electron) configurations.
